# Supplementary material for: The Pilot Study of Immunogenicity and Adverse Events of a COVID-19 Vaccine Regimen: Priming with Inactivated Whole SARS-CoV-2 Vaccine (CoronaVac) and Boosting with the Adenoviral Vector (ChAdOx1 nCoV-19) Vaccine
Source: MDPI journal article supplement (doi:10.3390/vaccines10040536), 2022-03-30
Supplement: s1 [file s1]

Supplementary Materials

1.Supplementary figure

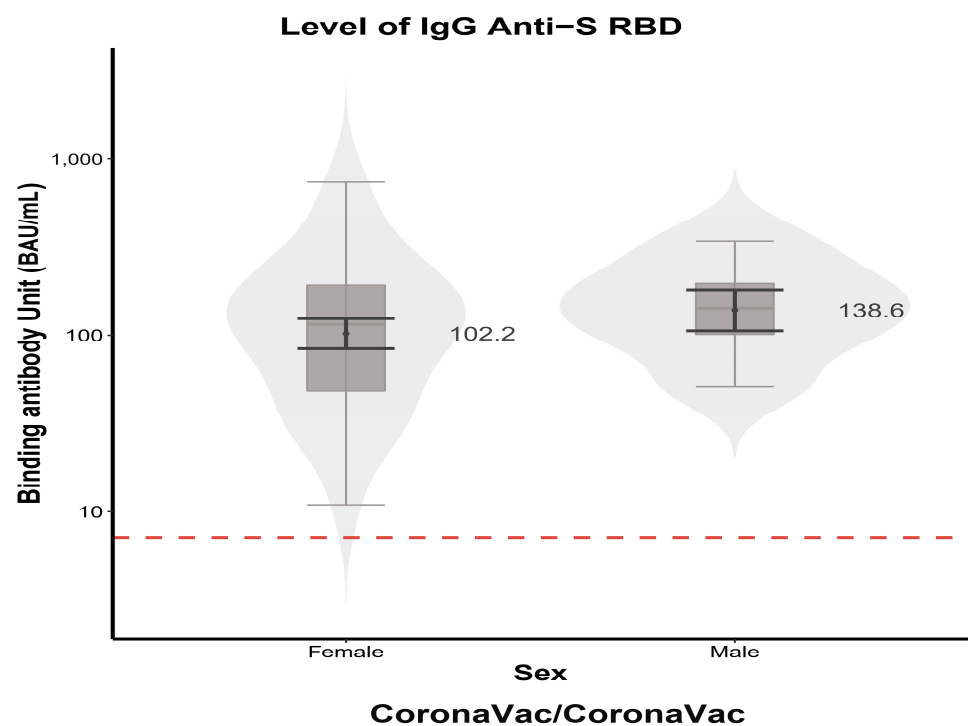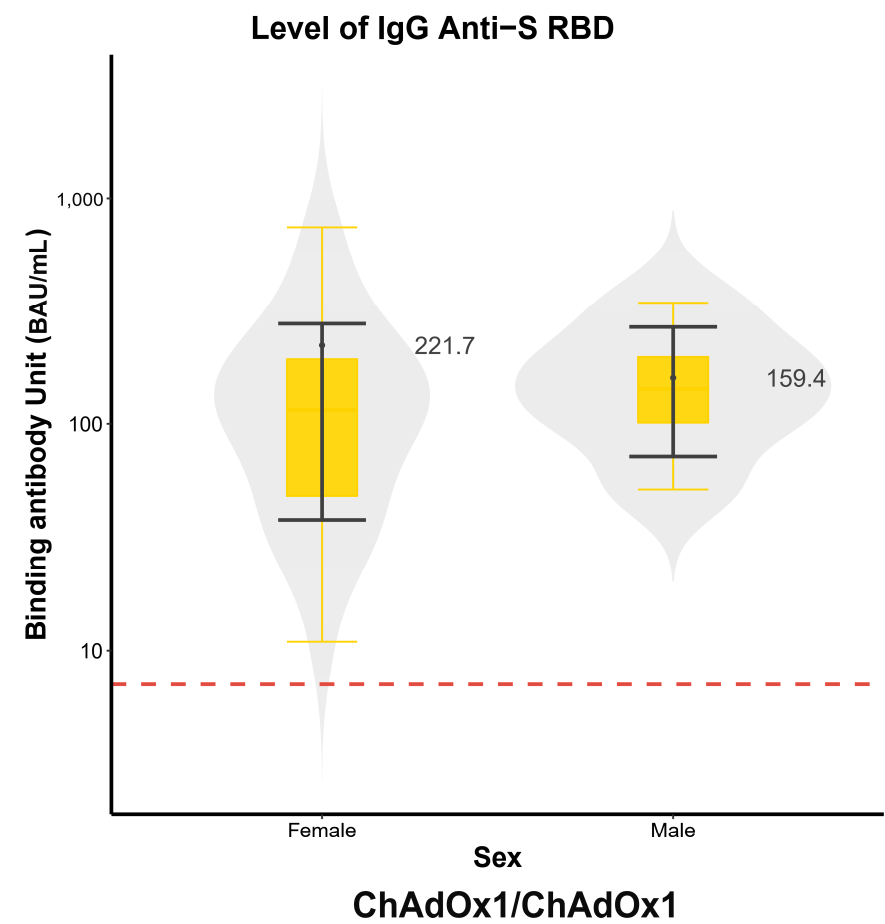

## Supplementary Figure S1: Violin plots comparing level of IgG anti-SRBD titer between males and females in CoronaVac/CoronaVac group and ChAdOx1/ChAdOx1 group

Boxplots show geometric mean and IQRs. Serum was collected at 4 weeks.

In CoronaVac/CoronaVac group, The GMT of anti-SRBD titer was (138.6 BAU/mL, 95% CI 69.5 – 276.2) in male, (102.2 BAU/mL, 95% CI 68.3 – 152.7) in female.

In ChAdOx1/ChAdOx1 group, The GMT of anti-SRBD titer was (159.4 BAU/mL, 95% CI 58.1 – 437.2) in male, (221.7 BAU/mL, 95% CI 166.5 – 295.2) in female.

There was no statistically significant difference between males and females in either the homologous CoronaVac (p-value = 0.436) or homologous ChAdOx1 (p-value = 0.209) group.

### 2.Supplementary table

|         | CoronaVac/CoronaVac |              | ChAdOx1/ChAdOx1 |               |
|---------|---------------------|--------------|-----------------|---------------|
|         | Male                | Female       | Male            | Female        |
| N       | 6                   | 26           | 7               | 40            |
| geoMean | 138.6               | 102.2        | 159.3           | 221.7         |
| Mean    | 164.3               | 159.0        | 280.8           | 313.3         |
| 95% CI  | 69.5 – 276.2        | 68.3 – 152.7 | 58.1 – 437.2    | 166.5 – 295.2 |
| p-value | 0.436               |              | 0.209           |               |

### Supplementary Table S1: Comparison of the anti-SRBD levels between males and females in homologous CoronaVac and ChAdOx1 group

Additionally, we compared the anti-SRBD qualitative level (BAU/mL) between males and females using the Wilcoxon rank sum test on R software. There was no statistically significant difference between males and females in either the

homologous CoronaVac (p-value = 0.436) or homologous ChAdOx1 (p-value = 0.209) group.

| Adverse events (AEs)           | CoronaVac/<br>ChAdOx1<br>N=155 | CoronaVac/<br>CoronaVac<br>N=32 | ChAdOx1/<br>ChAdOx1<br>N=47 | P-Value |
|--------------------------------|--------------------------------|---------------------------------|-----------------------------|---------|
| <b>Total AEs (%)</b>           | 129 (83.26%)                   | 18 (56%)                        | 23 (49%)                    | 0.02812 |
| <b>Systemic</b>                |                                |                                 |                             |         |
| <b>Feeling Feverish (%)</b>    | 104 (67%)                      | 1 (3%)                          | 11 (23%)                    | <0.001  |
| <b>Headache (%)</b>            | 51 (33%)                       | 6 (19%)                         | 5 (11%)                     | 0.0057  |
| <b>Myalgia (%)</b>             | 40 (25.81%)                    | 2 (6%)                          | 8 (17%)                     | 0.0351  |
| <b>Dyspnea (%)</b>             | 2 (1.29%)                      | 0                               | 0                           | 1       |
| <b>Paresthesia (%)</b>         | 1 (0.65%)                      | 0                               | 0                           | 1       |
| <b>Rash (%)</b>                | 3 (1.94%)                      | 0                               | 0                           | 0.5357  |
| <b>Fatigue (%)</b>             | 30 (19.35%)                    | 2 (6%)                          | 5 (11%)                     | 0.098   |
| <b>Diarrhea (%)</b>            | 4 (2.58%)                      | 1 (3%)                          | 2 (4%)                      | 0.844   |
| <b>Nausea And Vomiting (%)</b> | 13 (8.39%)                     | 4 (13%)                         | 0                           | 0.059   |
| <b>Local</b>                   |                                |                                 |                             |         |
| <b>Injected Site Pain (%)</b>  | 54 (35%)                       | 8 (25%)                         | 4 (9%)                      | 0.0035  |

### **Supplementary Table S2: Comparison of Adverse Events in Each Vaccine Regimen after the second vaccination dose**

The most common systemic AEs after the second vaccination dose within 4 weeks were feeling feverish (67.1%) in the CoronaVac- ChAdOx1 group and in the homologous ChAdOx1 group (23%) and headache (19%) in the homologous CoronaVac group

The most common local AE was injection site pain in all three groups (35.06% in the CoronaVac- ChAdOx1 group, 25% in the homologous CoronaVac group, and 9% the homologous ChAdOx1 group, respectively)
